# Supplementary material for: Freshening of Antarctic Intermediate Water in the South Atlantic Ocean in 2005–2014
Source: Copernicus journal article supplement (doi:10.5194/os-2016-54), 2016-08-01
Supplement: Supplementary file 1 [file os-2016-54-supplement.pdf]

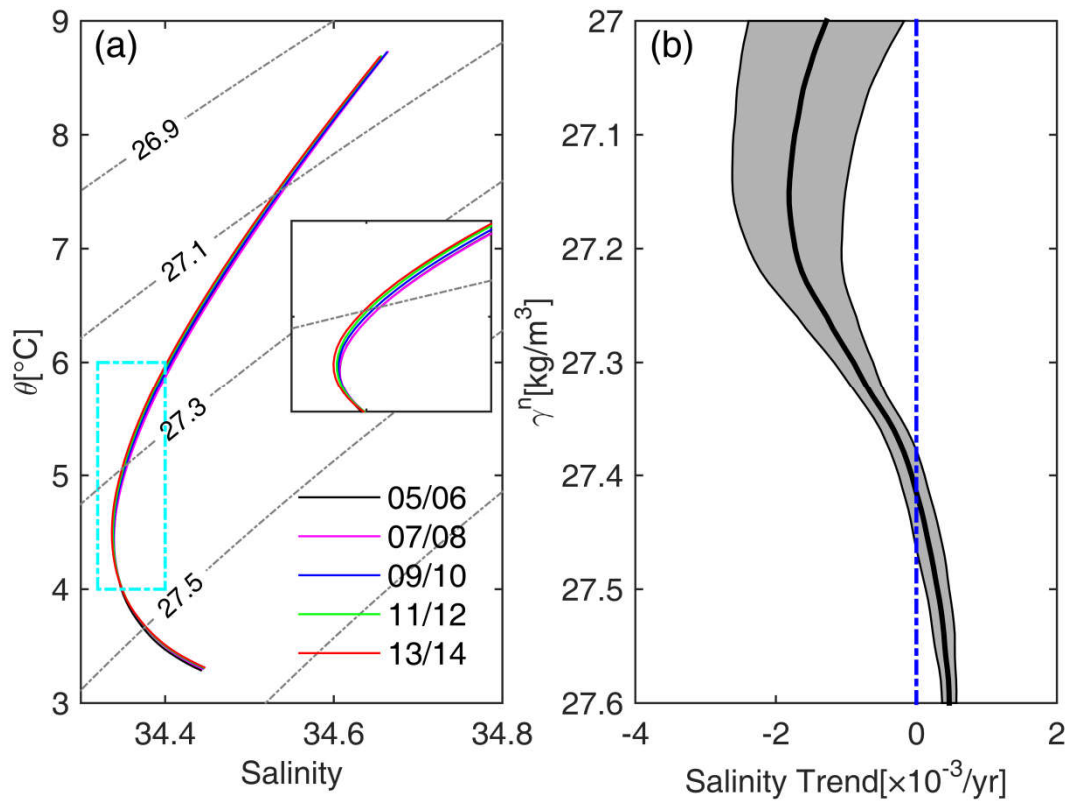

Supplementary 1 (a) Biennial mean  $\theta$ - $S$  diagram averaged over Region A for JAMSTEC data with  $\gamma^n$  surfaces superimposed (gray solid-dotted lines). The inserted figure is the magnification of the area delineated by cyan solid-dotted box. The corresponding time for each  $\theta$ - $S$  curve in is listed in their bottom-right corner (i.e. 05/06 for 2005-2006). (b) Salinity trend along  $\gamma^n$  surfaces for period Jan 2005 – Dec 2014 is displayed by the thick black line, and the 95% confidence intervals ( $F$ -test) are represented by the light gray shadings, calculated from JAMSTEC data.

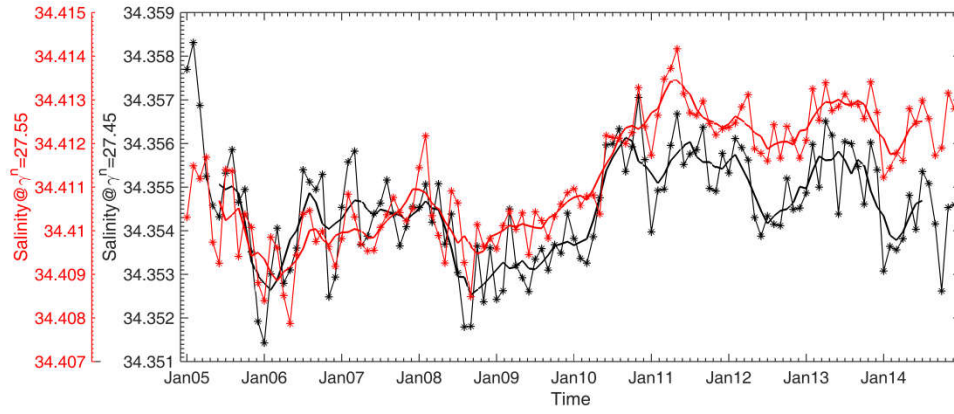

Supplementary 2 Time series of monthly salinity on 27.45 (black) and 27.55 $\sigma^{\theta}$  (red) neutral density surfaces, calculated from the IPRC data and averaged over the Region A shown in Fig. 2. Thin star lines and thick lines represent monthly and 13-month running mean values, respectively.
