# Supplementary material for: Freshening of Antarctic Intermediate Water in the South Atlantic Ocean in 2005–2014
Source: Copernicus journal article supplement (doi:10.5194/os-2016-54), 2016-08-01
Supplement: Supplementary file [file os-2016-54-RC2-supplement.pdf]

Edits in "Track Changes."

Freshening of Antarctic Intermediate Water in the South Atlantic Ocean in 2005 -2014

Wenjun Yao<sup>1</sup> , Jiuxin Shi<sup>1</sup>

<sup>1</sup>Key Lab of Physical Oceanography (Ocean University of China), Ministry of Education,  
Qingdao 266100, Shandong, China

Correspondence to: E-mail address: wjimyao@gmail.com (Wenjun Yao)

Abstract

Basin-scale freshening of Antarctic Intermediate Water (AAIW) is reported to have

~~dominated~~ occurred in the South Atlantic Ocean during the period from 2005 to 2014, as shown by the gridded

monthly means Argo (Array for Real-time Geostrophic Oceanography) data. ~~The relevant investigation~~ This phenomenon was also revealed by two ~~transatlantic occupations of~~ repeated transects along a section ~~along at~~ 30°

S, ~~from performed during the~~ World Ocean Circulation Experiment Hydrographic Program. Freshening of the

AAIW was compensated by ~~the opposing a~~ salinity increase of thermocline water, indicating ~~the contemporary a~~ hydrological cycle intensification. This was ~~illustrated supported~~ by the precipitation

less evaporation change in the Southern Hemisphere from 2000 to 2014, ~~with f~~ freshwater input from atmosphere to ocean surface increasing increased in the subpolar, high-precipitation region

and vice versa in the subtropical high-evaporation region. Against the background of

hydrological cycle ~~augment~~ changes, ~~the decreased a decrease in the~~ transport of Agulhas Leakage (AL) was proposed

to be ~~one of the a~~ contributors ~~for to~~ the associated freshening of AAIW. This indirectly estimated

Formatted: Font: Italic

variability of AL, ~~reflected by the~~was inferred from a weakening of wind stress over the South Indian Ocean

since the beginning of the 2000s, which would facilitates ~~the~~ freshwater input from the source region and partly

contributes to the observed ~~freshened-freshening of~~ AAIW. ~~Both of our~~The mechanical ~~analysis analyses used in this study are~~is qualitative,

but ~~this~~it is contended that this study-work would be helpful to validate and test predictably coupled sea-air model

simulations.

Keywords: Freshening; Antarctic Intermediate Water; South Atlantic; Agulhas Leakage;

Wind Stress

## 1. Introduction

Thermocline and intermediate waters play an important ~~role on~~part in global overturning circulation by ventilating the subtropical gyres in different parts of the world oceans [Sloyan

29 and Rintoul, 2001]. ~~Meanwhile, t~~hey also constitute the northern limb of the Southern  
 30 Hemisphere supergyre [Ridgway and Dunn, 2007; Speich et al., 2002].

31 ~~Many Previous~~ studies have ~~focused on~~addressed the variability of intermediate water. Wong et  
 al. [2001]

32 ~~pointed out~~found that the intermediate water had freshened ~~from between the~~ 1960s ~~to and the~~  
period 1985-94 in the Pacific

33 Ocean. Bindoff and McDougall [2000] reported that there had been a freshening of water  
 34 between 500 and 1500 db from 1962 to 1987 along 32° S in the Indian Ocean, and Curry et al.  
 35 [2003] ~~discovered the~~showed a salinity reduction on the isopycnal surface of intermediate water  
 for the

36 period 1950s -1990s in the western Atlantic. ~~All of the~~The freshening variability can be traced  
 37 back to the signature of water in the formation regions [Church et al., 1991]. The freshening  
 38 examples given above are in agreement with ~~the worldwide augment of~~changes in the  
 hydrological cycle, in which ~~context~~

39 the wet (precipitation > evaporation, P>E dominance) subpolar regions have been getting  
 40 wetter and vice versa for the dry (P<E dominance) subtropical regions ~~since over~~ the last 50 years  
 41 [Held and Soden, 2006; Skliris et al., 2014].

42 Antarctic Intermediate Water (AAIW) is characterized by a salinity minimum (core of  
 43 AAIW) and concentrated at a depth 600 -1000 m (Fig. 1), which lies within a potential density  
 44 (reference to sea surface) of  $\sigma_\theta = 27.1 - 27.3 \text{ kg/m}^3$  [Piola and Georgi, 1982]. The AAIW is  
 45 found from just north of the Subantarctic Front (SAF) [Orsi et al., 1995] in the Southern  
 46 Ocean and can be traced ~~into~~ as far as 20° N [Talley, 1996]. It is generally accepted that the  
 47 variability of AAIW is largely controlled by air-sea-ice interaction [Close et al., 2013;  
 48 Naveira Garabato et al., 2009; Santoso and England, 2004], but the argument about its origin  
 49 and formation process ~~is still going on~~continues. ~~The first popular one is the controversially~~For  
example, there is the

50 circumpolar formation theory of AAIW along the SAF, through mixing with Antarctic Surface  
 51 Water (AASW) along an isopycnal [Fetter et al., 2010; Sverdrup et al., 1942]. ~~And the~~  
~~other~~Alternatively, it has been proposed that there is a

52 ~~the~~ local formation ~~perspective~~ of AAIW in specific regions, as a bi-product of Subantarctic

Formatted: Font: Italic

53 Mode Water (SAMW) relating to deep convection [McCartney, 1982; Piola and Georgi,  
54 1982].

55 In the South Atlantic, AAIW constitutes the return branch of the Meridional Overturning  
56 Circulation (MOC) [Donners and Drijfhout, 2004; Speich et al., 2007; Talley, 2013]. As an

57 open ocean basin, [the](#) South Atlantic is fed by two different [sources of](#) AAIW [Sun and Watts,  
2002]. The

58 first is ~~the~~ younger, fresher and ~~has a~~ lower apparent oxygen utilization (AOU) ~~AAIW~~  
~~originated and originates~~

59 from the Southeast Pacific [McCartney, 1977; Talley, 1996] and the winter waters west of

60 Antarctic Peninsula [Naveira Garabato et al., 2009; Santoso and England, 2004]. ~~Almost all~~

61 ~~T~~hese ~~origin-source~~ regions of AAIW ~~is-are mostly~~ dominated by the net surface freshwater flux  
 from

62 atmosphere to ocean (P>E), which facilitates the freshening of AAIW with time. The second

63 is the older, saltier and higher AOU AAIW ~~which~~ comes from Indian Ocean, transported by  
 Agulhas

64 Leakage (AL) as Agulhas rings (Fig. 2). The mixture of the above two types of AAIW can

65 lead to ~~a~~ transition ~~for-of~~ hydrographic properties across the subtropical South Atlantic [Boebel et  
 66 al., 1997].

67 The influence of AL on variability of AAIW in the South Atlantic has been

68 demonstrated to be ~~greatly large~~ substantial [Hummels et al., 2015; Schmidtko and Johnson,  
 2012], as 50

69 -60% of the Atlantic AAIW originates from the Indian Ocean [Gordon et al., 1992; G D

70 McCarthy et al., 2012], with increased (decreased) transport of AL relating to salinification

71 (freshening) of AAIW. AL has apparently increased during ~~the~~ period from 1950s to the early  
 24 ~~1000s~~

72 [Durgadoo et al., 2013; Lübbecke et al., 2015], but ~~no one has focused on~~ there have been no  
~~studies addressing-discussing~~ the

73 influence of AL on the AAIW in South Atlantic since 2000, ~~especially for the last decade~~.

74 With the ~~development instigation~~ of ~~the~~ Argo (Array for Real-time Geostrophic Oceanography)

75 program, *in-situ* hydrographic observations ~~has~~ has ~~tremendously-greatly~~ expanded since 2003  
 [Roemmich

76 et al., 2015], particularly in the Southern Ocean (SO) where historical data are sparse and

77 intermittent. This decreases the uncertainty for the research on decadal variation of subsurface

78 and intermediate waters.

79 The present work ~~discovers-addresses~~ the freshening of AAIW in the South Atlantic ~~for the~~  
~~recent~~ over the preceding

80 decade (2005 -2014). Against the background of ~~an~~ enhanced hydrological cycle, decreased

Formatted: Font: Italic

81 transport of AL contributes to such ~~a variation~~freshening and may be driven, suggested by the a  
weakening of wind stress in

82 the South Indian Ocean during the same period.

## 83 2. Data and Methods

84 Based on individual temperature (T) and salinity (S) profiles from Argo, International

85 Pacific Research Centre (IPRC) gridded monthly means data for period 2005 -2014 are

86 produced using variational interpolation. The IPRC data have 27 levels from 0 to 2000 m

87 depth vertically, nominal 1°×1° grid globally and monthly temporal resolution.

88 ([http://apdrc.soest.hawaii.edu/projects/Argo/data/gridded/On\\_standard\\_levels/index-1.html](http://apdrc.soest.hawaii.edu/projects/Argo/data/gridded/On_standard_levels/index-1.html)).

89 To reduce the error from low vertical resolution of data when computing the hydrographic

90 values on isopycnal surface, ~~here~~ T and S profiles are first interpolated onto 1 m [depth](#) intervals

91 ~~vertically~~ using [a](#) spline instead of linear method. Because the IPRC data are interpolated from

92 randomly distributed Argo profiles, it is necessary to demonstrate the robust nature of ~~its~~ [their](#)

93 signals, by comparing with the other Argo gridded products. As a result, the Japan Agency of

94 Marine-Earth Science and Technology (JAMSTEC, [Hosoda et al., 2008]) T and S data from

95 2005 to 2014 with 1° longitude and 1° latitude resolution are also collected for comparison

96 and verification. The number of Argo profiles [s](#) is rapidly increasing year by year, and part of ~~its~~ [their](#)

97 distribution has ~~sd~~ been outlined in ~~some~~ previous studies, [inter alia](#) [Hosoda et al., 2008; Roemmich et al.,

98 2015].

99 Two hydrographic occupations of repeated transects [s](#) along 30° S ~~are collected~~ [were conducted](#) in the

100 World Ocean Circulation Experiment (WOCE) Hydrographic Program

101 ([http://www.nodc.noaa.gov/woce/wdiu/diu\\_summaries/whp/index.htm](http://www.nodc.noaa.gov/woce/wdiu/diu_summaries/whp/index.htm)). Their ~~positions~~  
102 ~~locations~~ are  
103 presented in Fig. 2. The first ~~occupation was collected with~~ transect consisted of 72 stations in  
104 2003 by the R/V  
105 Mirai (Japan, [Kawano et al., 2004]), the ~~other-second~~ was in 2011 with 81 stations ~~by~~  
106 ~~the sampled from the~~ Ronald H.  
107 Brown (United States, [Feely et al., 2011])  
108 ([http://www.nodc.noaa.gov/woce/wdiu/diu\\_summaries/whp/index.htm](http://www.nodc.noaa.gov/woce/wdiu/diu_summaries/whp/index.htm)). These two ~~sections~~  
109 ~~are not only measured~~ transects were not only performed in almost ~~the~~ repeated positions in  
110 the subtropical South Atlantic, but  
111 also ~~performed-conducted~~ in the same season (Nov and Oct respectively). Furthermore, the  
112 investigation time interval  
113 between the two ~~synoptic~~ sections from Nov 2003 to Oct 2011 ~~are nearly the same as is very~~  
114 similar to the  
115 IPRC data (Jan 2005 -Dec 2014), ~~which and~~ can therefore be used to confirm ~~the result of IPRC~~  
116 ~~data those results~~.  
117 To reduce the effect of dynamic processes in the ocean interior (i.e. mesoscale eddies and  
118 internal waves), the investigation of halocline variation ~~would-should~~ be along neutral density  
119 surfaces [G McCarthy et al., 2011; McDougall, 1987]. The layer of AAIW is defined using  
120 neutral density ( $\sigma_t$ , unit: kg/m<sup>3</sup>) [Jackett and McDougall, 1997] instead of potential density,  
121 with the upper and lower boundaries ~~of being~~ 27.1 $\sigma_t$  and 27.6 $\sigma_t$  [Goes et al., 2014], respectively.



115 Monthly 10m wind fields between years 1980 and 2014 from [the](#) ERA-interim archive at  
 116 [the](#) European Centre for Medium Range Weather Forecasts (ECMWF)  
 117 (<http://apps.ecmwf.int/datasets/data/interim-full-daily/levtype=sfc/>) are used to display the  
 118 decadal variability of wind stress (WS) over the South Indian Ocean. Another reanalysis wind  
 119 product of NCEP2 (National Centers for Environmental Prediction-Department of Energy  
 120 Atmospheric Model Intercomparison Project reanalysis 2, NCEP-DOE AMIP Reanalysis-2,  
 121 <http://www.esrl.noaa.gov/psd/data/gridded/data.ncep.reanalysis2.html>) [is used](#) for [the](#) period  
 122 1980-2014.  
 123 [meanwhile Additionally](#), the satellite-derived wind products of QuikSCAT for 2000-2007 and  
 124 ASCAT for  
 125 2008-2014 (Quick Scatterometer and Advanced Scatterometer, both in  
 126 <ftp://ftp.ifremer.fr/ifremer/cersat/products/gridded/MWF/L3/>) are ~~further collected~~[used](#) to  
 127 compare  
 128 and verify the decadal variability of WS revealed by [the](#) ERA-interim wind product. The WS in  
 129 this work over open ocean is calculated from 10 m wind field data using [the](#) equation adopted in  
 130 Trenberth et al. [1989].  
 131 Reanalysis data including precipitation (P) and evaporation (E) from ERA-interim are  
 132 used to reveal the freshwater input from [the](#) atmosphere to ocean surface in the ~~recent~~  
 133 [preceding](#) decade.  
 134 3. Freshening of Antarctic Intermediate Water  
 135 3.1 Freshening observed from Argo gridded products  
 136 The Argo gridded products provide [a globally](#) distributed and continuous time series of T  
 137 and S profiles down to 2000 m ocean depth. The present work ~~would focus~~[sess](#) on the AAIW in  
 138 [the](#) South Atlantic Basin (Fig. 2, Region A), which encompasses most of the subtropical gyre and  
 139 a part of the tropical regimes [Boebel et al., 1997; Talley, 1996]. ~~By the~~[The](#) Argo gridded data of  
 140 IPRC, the biennial mean of  $\sigma_{\theta}$ -S diagram (Fig. 3a) clearly ~~exhibits~~[shows](#) that the AAIW has  
 141 experienced a process of ~~progressively~~[eively](#) basin-scale freshening during the period from Jan  
 142 2005 to Dec 2014. The linear trend of salinity (Fig. 3b) further reveals that the freshening

139 takes up most of the AAIW layer but with a little salinification in the ~~lower-deeper~~ part of it.  
Except

140 around the 27.42.n neutral density surface, the AAIW variation is significant at ~~the~~ 95%  
141 confidence level, using the F-test criteria. In comparison with Fig. 3a, ~~we-it was~~ found that the  
142 cut-off point of transformation from salinity decrease to increase is near the salinity minimum.

143 Above ~~the~~ salinity minimum, the shift of .-S ~~curves-tends~~ towards cooler and fresher values  
along

~~5-five~~

144 density surfaces ~~and may be a~~ responses to the warming and freshening of surface waters  
 where AAIW

145 ventilates. Such thermohaline change has ~~sd~~ also been found in the Pacific and Indian oceans  
 146 over a different time period [Wong et al., 1999], and has ~~sd~~ been ~~explained-researched~~ by Bindoff  
 and

147 McDougall [1994], especially for the counterintuitive cooling of AAIW temperature. ~~For the~~The  
 148 salinity ~~decline-decrease~~ of core of AAIW, ~~it~~ indicates that such change can only be induced by  
 149 freshwater input from the source region, as mixing with surrounding more saline waters

150 cannot give rise to salt loss in the salinity minimum.

151 To demonstrate the robustness of AAIW variations revealed by IPRC data, re-plots of  
 152 Fig. 3a-b using another Argo gridded product, the JAMSTEC, are also shown for comparison  
 153 (see Supplementary 1, only AAIW layer shown). Not only the same variation along density  
 154 surfaces in the AAIW layer were found, but also ~~for the~~a freshening of the salinity minimum.  
 Both the

155 isoneutral salinity increases of IPRC and JAMSTEC data below the salinity minimum are quite  
 small.

156 The ~~most distinct~~main discrepancy between them is that the ~~amplitude-degree~~ of freshening  
~~revealed by in the~~

157 JAMSTEC data is somewhat less than IPRC and at ~~larger-a~~ higher 95% confidence level.

158 The freshwater gain for the basin-scale salinity decrease of AAIW (mean salinity  
 159 difference of 0.012 between 27.1.n and 27.6.n over a mean water mass thickness of 500 m) is  
 160 estimated at 15mm yr<sup>-1</sup> in its source region. However, the depth-integrated salinity change  
 161 over the water column (between 26.6.n and 27.6.n) is ~~in turn~~ 0.0014, ~~as since a~~ salinity increase  
 of

162 thermocline water balances the entirely observed freshening of AAIW. This salinity budget  
 163 implies contemporary hydrological cycle intensification in the southern hemisphere, which is  
 164 illustrated by the P less E change from 2000 to 2014, with P-E increasing in the subpolar  
 165 region and *vice versa* in the subtropical region (Fig. 4a). In ~~this~~ these cases, the thermocline  
 166 (intermediate) water that ventilates in the high-evaporation (precipitation) subtropical  
 167 (subpolar) regions gets more saline (freshened), as shown by the hydrographic observations (Fig.

Formatted: Font: Italic

168 3b).

169 Against the background of hydrological cycle augmentation, the annually freshwater input in  
170 the AAIW ventilation region during the freshened-freshening period increased by 0.02 mm day-  
171 about 17%

171 of the P-E in 2005 (Fig. 4b). ~~Actually, it is considered that,~~ the increase of P-E began in 1992, but  
172 there was a significant

172 increase around 2003 (Fig. 4b, 5-yr running mean line), which means the observed freshened

173 AAIW could be traced back to 2003. Though ~~we could not~~ it was not possible to compute the direct freshwater

174 input to the South Atlantic Basin herein this study, the Argo era freshening of AAIW is qualitatively

175 consistent with the freshwater gain in its source region.

176 3.2 Freshening in the quasi-synchronous WOCE CTD observations

177 Here ~~we further used~~ two synoptic transatlantic sections from WOCE hydrographic

178 program were used to explore the decadal ~~freshened~~ freshening signal identified in the above subsection. Similarly to Fig. 3a,

179 the sectional mean  $\sigma_t$ -S diagram (Fig. 5a) displays ~~thea~~ same shift of thermohaline values, including

180 ~~the~~ freshening of the salinity minimum, ~~the~~ salinity reduction in the upper AAIW layer and vice

181 versa in the lower layer. ~~Comparing~~ Compared to the  $\sigma_t$ -S curves of IPRC data (Fig. 3a), the curves of

182 WOCE (Fig. 5a) seem to be, in general, ~~with~~ cooler  $\sigma_t$  and fresher S. ~~in general~~, It is suggested that this is because the IPRC

183 mean ~~has more weight of~~ is weighted towards the warmer and saltier waters in the north.

184 Unlike the Argo gridded product, which has continuous time series of T and S data, there

185 are only two snapshot sections ~~of snapshot~~ in the WOCE observations. Instead of calculating the linear

186 trend of salinity (as was done with the IPRC data) ~~done~~, the difference of salinity observed in 2003 and 2011 ~~is was~~

187 estimated (Fig. 5b). The light ~~gray~~ grey shading denotes the 95% confidence intervals using simple

188 t-test criteria, ~~after considering~~ and having considered the number of degrees of freedom. Above the salinity

189 minimum, the freshening of AAIW revealed by IPRC and WOCE data are quite similar, with

190 the maximum appearing near 27.2.n. Because the last WOCE observation terminated in 2011

191 and the salinity reduction would continue at least up to 2014 as displayed in Fig. 3a, the

192 magnitude of the freshening in WOCE (Fig. 5b) is a little lesser than IPRC (Fig. 3b). Below

193 the salinity minimum, the salinity increase shown in the WOCE data is relatively large ~~revealed by WOCE data~~ (Fig.

Formatted: Font: Italic

Formatted: Font: Italic

194 3d). This is [thought to be](#) because the salinity rise reached ~~to~~ its maximum around 2011<sup>7</sup>. [This is](#)  
shown in the time

195 series of basinwide averaged salinity on 27.45.n and 27.55.n density surfaces (see  
196 Supplementary 2).

197 For the salinification of thermocline water, there is a large discrepancy between IPRC

198 and WOCE data, on neutral density surfaces 26.6-26.7.n (Fig. 5b). [But it is contended that](#) this  
would not affect

199 the ~~result that~~ salinity budget over the water column (Fig. 5b), [with given that](#) the salt gain of  
200 thermocline water [balancing would balance](#) the observed freshened AAIW. In conclusion, the  
general [trend](#) and

201 ~~detailed~~ consistency [of the detail therein](#) of [the](#) salinity change ~~signal~~ over the last ten year time  
period revealed by

202 IPRC and WOCE data ~~makes sure that our reported~~ leads us to state that the freshening of AAIW is [a robust finding](#) and

203 validated.

204 4. Decrease of Agulhas Leakage transport

205 AAIW in the South Atlantic is largely influenced by AL through the intermittent

206 pinching off of Agulhas rings (Fig. 2) [Beal et al., 2011], transferring salty thermocline and

207 intermediate water from [the](#) Indian Ocean to the South Atlantic [De Ruijter et al., 1999]. The

208 above discussion suggests that the freshening of AAIW is induced by [the](#) input of freshwater

209 from the source region. As a result, if the transport of more saline water from [the](#) Indian Ocean

210 decreased, it would promote the effect of this freshwater supplement. In this ~~part of~~ [paper section](#), the

211 decrease of AL transport ~~would be~~ demonstrated by using an indirect indicator. ~~as below. And~~

~~212 at last, thorough discussion with respect to other works is displayed.~~

213 4.1 Weakening of the westerlies in the South Indian Ocean

214 ~~Continuous measurements of the AL transport are now possible. There have never been~~  
~~continuous measurements of the AL transport until now.~~ The [study mentioned above](#)

215 ~~earlier study~~ suggested that an increased AL transport correlates well with [a](#) poleward shift of

216 westerlies [Beal et al., 2011]. However, after using re-analysis and climate models, Swart and

217 Fyfe [2012] argued that strengthening of Southern Hemisphere surface westerlies has

218 occurred without ~~robust trend~~ [major transgressions](#) in its latitudinal position over the period from 1979-2010,

219 during which period the AL has largely increased [Biaosoch et al., 2009]. A more recent study

220 of Durgadoo et al. [2013] ~~even~~ showed that the increase of AL is concomitant with

221 equatorward rather than poleward shift of westerlies in their simulation cases. ~~And they~~ [They also](#)

222 concluded that the intensity of westerlies is predominantly responsible in controlling this

223 Indian-Atlantic transport. Many relevant studies agreed on this relationship, that the

224 enhancement of westerlies intensity [relating is related](#) to the increase of AL [Goes et al., 2014; Lee et

225 al., 2011; Loveday et al., 2015].

226 The AL corresponds most significantly to westerlies strength averaged over the Indian

227 Ocean in contrast to that averaged circumpolarly or locally [Durgadoo et al., 2013]. ~~And~~

228 ~~according~~ According to the work of Durgadoo et al. [2013], zonally averaged WS was calculated  
from

229 the wind product of ERA-interim over the Indian Ocean (20-110° E) for every 5-yr period since

230 1980 (Fig. 6a and d). ~~As the same results as~~ Previous many other studies [Lee et al., 2011;  
Loveday et



231 al., 2015], [have found that](#) the WS has considerably increased from 1980s to the beginning of 2000s (Fig. 6d),

232 consistent with the contemporary increase of AL transport. Though there are oscillations

233 during 1990s, the WS reached ~~to~~ its peak around the years [2000-2004](#) (Fig. 6d). ~~And then the WS~~

234 began to decline. ~~Thus it shows that~~ [It can be concluded that](#) the WS has weakened for period 2000 – 2014 (Fig. 6d),

235 ~~suggesting the~~ [which is](#) concurrent [with a](#) decrease of AL transport.

236 In addition to the ERA-interim wind data, we have further checked the zonally averaged

237 WS over the Indian Ocean (20-110° E), using another reanalysis product of NCEP2 (Fig. 6b

238 and e) and the combined QuikSCAT-ASCAT (Fig. 6c and f) satellite-derived wind products.

239 ~~All of the~~ [The](#) three zonally averaged WS [datasets](#) agree ~~on~~ that during the period 2000-2014, the

240 westerlies reached ~~to its~~ [a](#) peak in the years [2000-2004](#), and then progressively subsided through

241 [2005-2009](#) to [2010-2014](#). The process of gradual decline of WS is most ~~distinctly~~ [illustrated](#) [pronounced](#) in the

242 NCEP2 data. ~~And what is important, we also note~~ [It is noteworthy](#) that ~~neither~~ [none](#) of the three products show a

243 significant meridional shift of the latitude of maximum WS from 2000 to 2014, ~~concomitant~~ [agreeing](#)

244 with the conclusion of Swart and Fyfe [2012].

#### 245 4.2 Evidence from other works

246 Many efforts have been made to estimate AL transport, especially using model

247 simulations [Lübbecke et al., 2015; Loveday et al., 2015]. In recent years, Le Bars et al. [2014]

248 provided the time series of AL transport over the satellite altimeter era, computed from

249 absolute dynamic topography data, which can ~~manifest~~ [show](#) the decadal variation of AL present.

250 ~~here~~. In their result (Figure 8 in Le Bars et al. [2014]), the anomalies of AL from satellite

251 altimeter ~~ryer~~ reached ~~to the~~ [a](#) peak around 2003 (annual average), and then began to subside,

252 ~~though in the middle of 2011 it appeared to increase again~~ [apart from a mid-2011 increase](#). In addition, their negative trend of

253 AL (Figure 9 in Le Bars et al. [2014]) over the period from Oct 1992 to Dec 2012 indicates

254 that the transport [was](#) reduced during the 2000s in contrast to the 1990s. ~~There is another work~~  
255 ~~done~~ [Another study](#) by Biastoch et al. [2015] ~~which could~~ [may be of help in the present](#)  
[discussion](#) ~~support the discussion here~~. Though the time  
256 series of AL obtained from models did ~~n~~ot show a distinct decline of AL transport in the last  
257 decade, [which may be](#) partly due to the data filter applied and the end of time series in 2010  
(Figure 4 in  
258 Biastoch et al. [2015]), it ~~apparently~~ displays a maximum of salt transport around 2000

259 (Figure 5 in Biastoch et al. [2015]). ~~These~~This peak and subsequent decline of salt transport ~~are~~  
260 is

consistent with the freshening of AAIW over the similar time period ~~observed~~considered here.

261 Thus, in addition to the freshwater input that gives rise to the salt loss of the AAIW in

262 the South Atlantic Ocean, ~~less-reduced~~ transport of AL or salt will further ~~facilitate~~enhance this  
signal. ~~But~~

263 ~~Un~~Unfortunately, ~~both~~ the analysis of the contribution from both the source region and AL ~~are~~is  
264 qualitative~~ly~~

~~instead of quantitatively, only by using the traditionally hydrographic and atmospheric~~

~~265 reanalysis data.~~ Future work should be focused on quantification of each factor based on

266 model simulations.

## 267 5. Conclusions

268 The analysis of IPRC gridded data shows that AAIW in the South Atlantic has

269 experienced basin-scale freshening for the period from Jan 2005 to Dec 2014 (Fig. 3a and b),

270 with freshwater input estimated at 15 mm yr<sup>-1</sup> in its source region. Two ~~synoptic~~ transects of

271 WOCE hydrographic program observed in 2003 and 2011 also reveal the above ~~well-marked~~

272 variation of AAIW in the last decade (Fig. 3c and d).

273 ~~Such freshened signal~~This freshening in the intermediate water layer is ~~illustrated~~thought to be  
compensated by

274 increased salinity in shallower thermocline water, indicating ~~the a~~ contemporary intensification

275 of the hydrological cycle (Fig. 3b and Fig. 5b). In this case the freshwater input from atmosphere

276 to ocean surface increased in the subpolar high-evaporation region and vice versa in the

277 subtropical high-precipitation region (Fig. 4a). Over the last ten year time period, significant

278 freshwater gain began around 2003 (Fig. 4b), suggesting the observed freshened AAIW could

279 be traced back to this time.

280 Against the background of hydrological intensification, the decrease of AL transport is

281 proposed to contribute to the freshening of AAIW in the South Atlantic, ~~reflected by~~associated  
282 with a the

weakening of westerlies over the South Indian Ocean. It shows that the WS over the South  
Indian

Formatted: Font: Italic

283 Ocean reached to its peak around [2000-2004](#) and began to subside through [2005-2009](#) to [2010-](#)  
284 [2014](#) (Fig. 6),

285 reversing its increasing phase from 1950s to the beginning of 2000s, during which period the

286 AL had ~~concomitantly~~ increased [Durgadoo et al., 2013; Lübbecke et al., 2015]. This

287 indirectly estimated variability of AL, is consistent with ~~the discussion of it~~ [other studies covering](#)  
288 ~~over the~~ similar

289 period [Biaśtoch et al., 2015; Le Bars et al., 2014]. As the AAIW carried by AL is more

288 saline relative to its counterpart in the South Atlantic Ocean, its decrease would promote the  
289 effect of freshwater input from the source region, contributing to the observed freshening.

290 Both the analysis of freshwater input and ~~less-reduced~~ transport ~~in the~~ AL reported here are  
qualitative

291 but not quantitative. The purpose of this work is to reveal the decadal freshening of AAIW in

292 ~~the~~ South Atlantic Ocean over the last ten year time period, and ~~its-correspondingsuggest a~~  
~~contributing~~ mechanism.

293 Future work should be focused on the quantification of these two contributors, ~~meanwhile~~

294 ~~revealing- and its the~~ influence ~~it has~~ on the world ocean circulation.

295

296 Acknowledgements

297 This study is supported by the Chinese Polar Environment Comprehensive Investigation

298 and Assessment Programs (Grant nos. CHINARE-04-04, CHINARE-04-01).

299

300 Captions of Figures

301

302 Fig. 1 WOCE salinity sections along 30° S in the South Atlantic Ocean (positions shown in

303 Fig. 2) observed in (a) 2003 and (b) 2011. Overlaid white solid-dotted lines are .n

surfaces

304 ranging from 26.9 to 27.5 kg/m<sup>3</sup>, with 0.2 kg/m<sup>3</sup> interval.

305

306

307 Fig. 2 Bathymetry of the South Indian-Atlantic oceans. Color shading is ocean depth. Red box  
308 delineates the area for the basinwide average of gridded data (hereafter refers to Region A).  
309 Magenta stars represent transatlantic CTD stations measured in 2003, meanwhile blue dots in  
310 2011. The Agulhas Current, Retroflection, Agulhas Return Current and Agulhas Leakage (as  
311 eddies) are also shown and ticked.

312

313

314 Fig. 3 (a) Biennial mean  $\sigma_{\theta}$ -S

diagram averaged over Region A for IPRC data with  $\sigma_{\theta}$  surfaces

315 superimposed (grey solid-dotted lines). The inserted figure is the magnification of the area

316 delineated by cyan solid-dotted box. The corresponding time for each  $\sigma_{\theta}$ -S

curve in is listed in

317 their bottom-right corner (i.e. 05/06 for 2005-2006). (b) Salinity trend along  $\sigma_{\theta}$ -S

surfaces for

318 period Jan 2005 – Dec 2014 is displayed by the thick black line, and the 95% confidence

319 intervals (F-test) are represented by the light grey shadings, calculated from IPRC data.

320

321

322

12

323

324 Fig. 4 Calculated from ERA-interim precipitation and evaporation data: (a) Zonally mean  
325 (ocean areas only) of annually P-E  
(freshwater input, mm day<sup>-1</sup>), each line represents a 5-yr  
326 averaged result. The corresponding time period (i.e. 00-04 for 2000-2004) is listed in the  
327 bottom-left corner. (b) Time series of annually P-E  
averaged over the oceans in 45-65° S,  
328 0-360° E band from 1979 to 2014 (blue star), and its 5-yr running mean (black).

329

13

330

331 Fig. 5 (a) The same as Fig. 3a but for sectional mean of WOCE hydrographic casts. The

332 corresponding year for each .-S

curve in is listed in their bottom-right corner. (b) Sectional

333 mean differences (thick black line) of WOCE hydrographic data along .n

and their 95%

334 confidence intervals (grey shadings, t-test).

335



336

337 Fig. 6 Zonally averaged wind stress calculated from the wind product of (a) ERA-interim, (b)  
338 NCEP2 and (c) ASCAT/QSCAT over the Indian Ocean (20° E-110° E) for different periods  
339 (i.e. 80-84 for Jan 1980 -Dec 1984; 00-04 for Jan 2000 -Dec 2004) listed in the top-right  
340 corners. (d), (e) and (f) are the magnification of cyan boxes in (a), (b) and (c), respectively.
